# Supplementary material
Source: PubMed Central journal article supplement (PMC4277570)
Supplement: AEM.02768-14_zam999105950so1.pdf [file AEM.02768-14_zam999105950so1.pdf]

## Supplementary Materials

### **A new MultiLocus VNTR Analysis tool for surveillance and local epidemiology of Bacterial Leaf Blight and Bacterial Leaf Streak of rice caused by *Xanthomonas oryzae***

L. Poulin<sup>1</sup>, P. Grygiel<sup>2</sup>, M. Magne<sup>2</sup>, L. Gagnevin<sup>2</sup>, L.M. Rodriguez-R<sup>1</sup>, N. Forero Serna<sup>1</sup>, S. Zhao<sup>1</sup>, M. El Rafii<sup>1</sup>, S. Dao<sup>3</sup>, C. Tekete<sup>3</sup>, O. Koita<sup>3</sup>, O. Pruvost<sup>2</sup>, V. Verdier<sup>1</sup>, C. Vernière<sup>2§</sup>, R. Koebnik<sup>1§</sup>

<sup>1</sup>*UMR 186 Résistance des Plantes aux Bio-agresseurs, Institut de Recherche pour le Développement, Montpellier, France*

<sup>2</sup>*UMR PVBMT, Centre de Coopération Internationale en Recherche Agronomique pour le Développement, Saint-Pierre, La Réunion, France*

<sup>3</sup>*Laboratoire de Biologie Moléculaire Appliquée, Faculté des Sciences et Techniques (FAST), Université des Sciences Techniques et Technologie, Bamako, Mali*

§ These authors contributed equally to this work.

TABLE S1 *Xanthomonas oryzae* strains used in this study

| Strain name                                                | Year of isolation | Host species                | Country of origin | Locality                     | References                    |
|------------------------------------------------------------|-------------------|-----------------------------|-------------------|------------------------------|-------------------------------|
| <i>Xanthomonas oryzae</i> pv. <i>oryzicola</i> from Africa |                   |                             |                   |                              |                               |
| BAI5                                                       | 2009              | <i>Oryza sativa</i>         | Burkina Faso      | Haut-Bassins, Vallée du Kou  | Wonni <i>et al.</i> , 2014    |
| BAI6                                                       | 2009              | <i>O. sativa</i>            | Burkina Faso      | Haut-Bassins, Vallée du Kou  | Wonni <i>et al.</i> , 2014    |
| BAI7                                                       | 2009              | <i>Oryza longistaminata</i> | Burkina Faso      | Centre-Est, Itenga           | Wonni <i>et al.</i> , 2014    |
| BAI8                                                       | 2009              | <i>O. longistaminata</i>    | Burkina Faso      | Centre-Est, Itenga           | Wonni <i>et al.</i> , 2014    |
| BAI9                                                       | 2009              | <i>O. longistaminata</i>    | Burkina Faso      | Centre-Est, Itenga           | Wonni <i>et al.</i> , 2014    |
| BAI10                                                      | 2009              | <i>O. longistaminata</i>    | Burkina Faso      | Centre-Est, Itenga           | Wonni <i>et al.</i> , 2014    |
| BAI11                                                      | 2009              | Wild rice                   | Burkina Faso      | Centre-Est, Itenga           | Wonni <i>et al.</i> , 2014    |
| BAI12                                                      | 2009              | <i>O. sativa</i>            | Burkina Faso      | Centre-Est, Bagré            | Wonni <i>et al.</i> , 2014    |
| BAI13                                                      | 2009              | Weed                        | Burkina Faso      | Centre-Est, Bagré            | Wonni <i>et al.</i> , 2014    |
| BAI14                                                      | 2009              | <i>O. sativa</i>            | Burkina Faso      | Centre-Est, Bagré            | Wonni <i>et al.</i> , 2014    |
| BAI15                                                      | 2009              | <i>O. sativa</i>            | Burkina Faso      | Centre-Est, Bagré            | Wonni <i>et al.</i> , 2014    |
| BAI16                                                      | 2009              | <i>O. sativa</i>            | Burkina Faso      | Centre-Est, Bagré            | Wonni <i>et al.</i> , 2014    |
| BAI17                                                      | 2009              | <i>Pennisetum</i> sp.       | Burkina Faso      | Centre-Est, Bagré            | Wonni <i>et al.</i> , 2014    |
| BAI18                                                      | 2009              | <i>O. sativa</i>            | Burkina Faso      | Centre-Est, Koulwooko        | Wonni <i>et al.</i> , 2014    |
| BAI20                                                      | 2009              | Weed                        | Burkina Faso      | Cascades, Karfiguela         | Wonni <i>et al.</i> , 2014    |
| BAI21                                                      | 2009              | <i>O. sativa</i>            | Burkina Faso      | Cascades, Karfiguela         | Wonni <i>et al.</i> , 2014    |
| BAI22                                                      | 2009              | <i>O. longistaminata</i>    | Burkina Faso      | Cascades, Karfiguela         | Wonni <i>et al.</i> , 2014    |
| BAI34                                                      | 2009              | <i>O. sativa</i>            | Burkina Faso      | Cascades, Karfiguela         | Wonni <i>et al.</i> , 2014    |
| BAI36                                                      | 2010              | <i>O. sativa</i>            | Burkina Faso      | Boucle du Mouhoun, Niassan   | Wonni <i>et al.</i> , 2014    |
| BAI37                                                      | 2010              | <i>O. sativa</i>            | Burkina Faso      | Centre-Est, Bagré            | Wonni <i>et al.</i> , 2014    |
| BAI40                                                      | 2010              | <i>O. sativa</i>            | Burkina Faso      | Centre-Est, Bagré            | Wonni <i>et al.</i> , 2014    |
| BAI42                                                      | 2010              | <i>O. sativa</i>            | Burkina Faso      | Centre-Est, Bagré            | Wonni <i>et al.</i> , 2014    |
| BAI43                                                      | 2010              | <i>O. sativa</i>            | Burkina Faso      | Hauts-Bassins, Niéna-Donkélé | Wonni <i>et al.</i> , 2014    |
| BAI44                                                      | 2010              | <i>O. sativa</i>            | Burkina Faso      | Hauts-Bassins, Niéna-Donkélé | Wonni <i>et al.</i> , 2014    |
| BAI60                                                      | 2011              | <i>O. sativa</i>            | Burkina Faso      | Boucle du Mouhoun, Niassan   | Wonni <i>et al.</i> , 2014    |
| BAI62                                                      | 2011              | <i>Brachiaria lata</i>      | Burkina Faso      | Boucle du Mouhoun, Niassan   | Wonni <i>et al.</i> , 2014    |
| BAI64                                                      | 2011              | <i>O. sativa</i>            | Burkina Faso      | Boucle du Mouhoun, Niassan   | Dr I. Wonni                   |
| BAI65                                                      | 2011              | <i>Paspalum vaginatum</i>   | Burkina Faso      | Boucle du Mouhoun, Niassan   | Wonni <i>et al.</i> , 2014    |
| BAI68                                                      | 2011              | <i>O. longistaminata</i>    | Burkina Faso      | Boucle du Mouhoun, Niassan   | Wonni <i>et al.</i> , 2014    |
| BAI69                                                      | 2011              | <i>O. longistaminata</i>    | Burkina Faso      | Cascades, Karfiguela         | Wonni <i>et al.</i> , 2014    |
| BAI71                                                      | 2011              | <i>O. sativa</i>            | Burkina Faso      | Cascades, Karfiguela         | Dr I. Wonni                   |
| BAI76                                                      | 2011              | <i>O. sativa</i>            | Burkina Faso      | Cascades, Karfiguela         | Wonni <i>et al.</i> , 2014    |
| BAI81                                                      | 2011              | <i>O. sativa</i>            | Burkina Faso      | Cascades, Karfiguela         | Dr I. Wonni                   |
| BAI82                                                      | 2011              | <i>O. sativa</i>            | Burkina Faso      | Cascades, Karfiguela         | Wonni <i>et al.</i> , 2014    |
| MAI3 (CFBP 7326)                                           | 2003              | <i>O. sativa</i>            | Mali              | Office du Niger, Niono       | Gonzalez <i>et al.</i> , 2007 |
| MAI5 (CFBP 7328)                                           | 2003              | <i>O. sativa</i>            | Mali              | Office du Niger, Niono       | Gonzalez <i>et al.</i> , 2007 |
| MAI6 (CFBP 7329)                                           | 2003              | <i>O. sativa</i>            | Mali              | Office du Niger, Niono       | Gonzalez <i>et al.</i> , 2007 |
| MAI7 (CFBP 7334)                                           | 2003              | <i>O. sativa</i>            | Mali              | Office du Niger, Niono       | Gonzalez <i>et al.</i> , 2007 |
| MAI8 (CFBP 7330)                                           | 2003              | <i>O. sativa</i>            | Mali              | Office du Niger, Niono       | Gonzalez <i>et al.</i> , 2007 |
| MAI10 (CFBP 7331)                                          | 2003              | <i>O. sativa</i>            | Mali              | Office du Niger, Niono       | Gonzalez <i>et al.</i> , 2007 |
| MAI11 (CFBP 7335)                                          | 2003              | <i>O. sativa</i>            | Mali              | Office du Niger, Niono       | Gonzalez <i>et al.</i> , 2007 |
| MAI12                                                      | 2003              | <i>O. sativa</i>            | Mali              | Office du Niger, Niono       | Gonzalez <i>et al.</i> , 2007 |
| MAI13                                                      | 2003              | <i>O. sativa</i>            | Mali              | Office du Niger, Niono       | Gonzalez <i>et al.</i> , 2007 |
| MAI16                                                      | 2009              | <i>O. sativa</i>            | Mali              | Office du Niger, Molodo      | Wonni <i>et al.</i> , 2014    |
| MAI17                                                      | 2009              | <i>O. sativa</i>            | Mali              | Office du Niger, Kogoni      | Wonni <i>et al.</i> , 2014    |

|                                                                 |      |                          |       |                            |                            |
|-----------------------------------------------------------------|------|--------------------------|-------|----------------------------|----------------------------|
| <b>MAI18 (CFBP 7338)</b>                                        | 2009 | <i>O. longistaminata</i> | Mali  | Office du Niger, Kogoni    | Wonni <i>et al.</i> , 2014 |
| <b>MAI19</b>                                                    | 2009 | <i>O. longistaminata</i> | Mali  | Office du Niger, Kogoni    | Wonni <i>et al.</i> , 2014 |
| <b>MAI20</b>                                                    | 2009 | <i>O. longistaminata</i> | Mali  | Office du Niger, Kogoni    | Wonni <i>et al.</i> , 2014 |
| <b>MAI21</b>                                                    | 2009 | <i>O. longistaminata</i> | Mali  | Office du Niger, Kogoni    | Wonni <i>et al.</i> , 2014 |
| <b>MAI22</b>                                                    | 2009 | <i>Oryza barthii</i>     | Mali  | Office du Niger, Kogoni    | Wonni <i>et al.</i> , 2014 |
| <b>MAI23</b>                                                    | 2009 | <i>O. barthii</i>        | Mali  | Office du Niger, Kogoni    | Wonni <i>et al.</i> , 2014 |
| <b>MAI24</b>                                                    | 2009 | <i>O. barthii</i>        | Mali  | Office du Niger, Kogoni    | Wonni <i>et al.</i> , 2014 |
| <b>MAI25</b>                                                    | 2009 | <i>O. longistaminata</i> | Mali  | Office du Niger, Kogoni    | Wonni <i>et al.</i> , 2014 |
| <b>MAI26</b>                                                    | 2009 | <i>O. sativa</i>         | Mali  | Office du Niger, Macina    | Wonni <i>et al.</i> , 2014 |
| <b>MAI29</b>                                                    | 2009 | <i>O. sativa</i>         | Mali  | Office du Niger, Macina    | Wonni <i>et al.</i> , 2014 |
| <b>MAI30</b>                                                    | 2009 | <i>O. sativa</i>         | Mali  | Office du Niger, Macina    | Wonni <i>et al.</i> , 2014 |
| <b>MAI32</b>                                                    | 2009 | <i>O. sativa</i>         | Mali  | Office du Niger, Macina    | Wonni <i>et al.</i> , 2014 |
| <b>MAI34</b>                                                    | 2009 | <i>O. sativa</i>         | Mali  | Office du Niger, Macina    | Wonni <i>et al.</i> , 2014 |
| <b>MAI35</b>                                                    | 2009 | <i>O. sativa</i>         | Mali  | Office du Niger, Macina    | Wonni <i>et al.</i> , 2014 |
| <b>MAI36</b>                                                    | 2009 | <i>O. barthii</i>        | Mali  | Office du Niger, Ndebougou | Wonni <i>et al.</i> , 2014 |
| <b>MAI40</b>                                                    | 2009 | <i>O. sativa</i>         | Mali  | Sikasso, Sélingué          | Wonni <i>et al.</i> , 2014 |
| <b>MAI42</b>                                                    | 2009 | <i>O. sativa</i>         | Mali  | Sikasso, Sélingué          | Wonni <i>et al.</i> , 2014 |
| <b>MAI43</b>                                                    | 2009 | <i>O. sativa</i>         | Mali  | Sikasso, Sélingué          | Wonni <i>et al.</i> , 2014 |
| <b>MAI44</b>                                                    | 2009 | <i>O. sativa</i>         | Mali  | Sikasso, Sélingué          | Wonni <i>et al.</i> , 2014 |
| <b>MAI45</b>                                                    | 2009 | <i>O. sativa</i>         | Mali  | Sikasso, Sélingué          | Wonni <i>et al.</i> , 2014 |
| <b>MAI46</b>                                                    | 2009 | <i>O. sativa</i>         | Mali  | Koulikoro, Baguineda       | Wonni <i>et al.</i> , 2014 |
| <b>MAI48</b>                                                    | 2012 | <i>O. sativa</i>         | Mali  | Koulikoro, Baguineda       | LBMA                       |
| <b>MAI50</b>                                                    | 2012 | <i>O. sativa</i>         | Mali  | nd                         | LBMA                       |
| <b>MAI57</b>                                                    | 2013 | <i>O. sativa</i>         | Mali  | nd                         | LBMA                       |
| <b>MAI58</b>                                                    | 2013 | <i>O. sativa</i>         | Mali  | nd                         | LBMA                       |
| <b><i>Xanthomonas oryzae</i> pv. <i>oryzicola</i> from Asia</b> |      |                          |       |                            |                            |
| <b>Xoc-china</b>                                                | nd   | <i>O. sativa</i>         | China | nd                         | Dr J.E. Leach              |
| <b>AH-CF-1</b>                                                  | 2011 | nd                       | China | Anhui, Zhipu               | Dr S. Zhao                 |
| <b>AH-CF-3</b>                                                  | 2011 | nd                       | China | Anhui, Zhipu               | Dr S. Zhao                 |
| <b>AH-CF-5</b>                                                  | 2011 | nd                       | China | Anhui, Zhipu               | Dr S. Zhao                 |
| <b>AH-DY-1</b>                                                  | 2011 | <i>O. sativa</i>         | China | Anhui, Beiyao              | Dr S. Zhao                 |
| <b>AH-DY-5</b>                                                  | 2011 | <i>O. sativa</i>         | China | Anhui, Qiaozhang           | Dr S. Zhao                 |
| <b>AH-MG-1</b>                                                  | 2011 | nd                       | China | Anhui, Caigang             | Dr S. Zhao                 |
| <b>AH-MG-4</b>                                                  | 2011 | <i>O. sativa</i>         | China | Anhui, Shishuo             | Dr S. Zhao                 |
| <b>AH-MG-6</b>                                                  | 2011 | <i>O. sativa</i>         | China | Anhui, Shishuo             | Dr S. Zhao                 |
| <b>AH-MG-7</b>                                                  | 2011 | nd                       | China | Anhui, Mingguang           | Dr S. Zhao                 |
| <b>AH-YS-4</b>                                                  | 2011 | <i>O. sativa</i>         | China | Anhui, Huangliangou        | Dr S. Zhao                 |
| <b>AH-YS-6</b>                                                  | 2011 | <i>O. sativa</i>         | China | Anhui, Huangliangou        | Dr S. Zhao                 |
| <b>FJ-SW-1</b>                                                  | 2011 | <i>O. sativa</i>         | China | Zhejiang, Shuikouzhai      | Dr S. Zhao                 |
| <b>FJ-SW-2</b>                                                  | 2011 | <i>O. sativa</i>         | China | Zhejiang, Shuikouzhai      | Dr S. Zhao                 |
| <b>FJ-SW-3</b>                                                  | 2011 | <i>O. sativa</i>         | China | Zhejiang, Shuikouzhai      | Dr S. Zhao                 |
| <b>FJ-SW-5</b>                                                  | 2011 | <i>O. sativa</i>         | China | Zhejiang, Shuikouzhai      | Dr S. Zhao                 |
| <b>GD-CZ-1</b>                                                  | 2011 | <i>O. sativa</i>         | China | Guangdong, Lixi            | Dr S. Zhao                 |
| <b>GX-LC-1</b>                                                  | 2011 | nd                       | China | Guangxi, Luchuang          | Dr S. Zhao                 |
| <b>GX-LC-3</b>                                                  | 2011 | nd                       | China | Guangxi, Luchuang          | Dr S. Zhao                 |
| <b>HN-DA-1</b>                                                  | 2011 | <i>O. sativa</i>         | China | Hainan, Jixiu              | Dr S. Zhao                 |
| <b>HN-DZ-5</b>                                                  | 2011 | nd                       | China | Hainan, Tongtan            | Dr S. Zhao                 |
| <b>HN-DZ-10</b>                                                 | 2011 | <i>O. sativa</i>         | China | Hainan, Wuji               | Dr S. Zhao                 |
| <b>HN-DZ-13</b>                                                 | 2011 | <i>O. sativa</i>         | China | Hainan, Wuji               | Dr S. Zhao                 |
| <b>HN-DZ-16</b>                                                 | 2011 | <i>O. sativa</i>         | China | Hainan, Wuji               | Dr S. Zhao                 |
| <b>HN-WC-13</b>                                                 | 2011 | <i>O. sativa</i>         | China | Hainan, Mingbai            | Dr S. Zhao                 |
| <b>ZJ-PY-2</b>                                                  | 2011 | <i>O. sativa</i>         | China | Zhejiang, Jiafeng          | Dr S. Zhao                 |

|                               |      |                  |             |                      |                           |
|-------------------------------|------|------------------|-------------|----------------------|---------------------------|
| <b>FJ07</b>                   | 2008 | <i>O. sativa</i> | China       | Fujian               | Dr S. Zhao                |
| <b>FJ11</b>                   | 2008 | <i>O. sativa</i> | China       | Fujian               | Zhao <i>et al.</i> , 2012 |
| <b>FJ12</b>                   | 2008 | <i>O. sativa</i> | China       | Fujian               | Zhao <i>et al.</i> , 2012 |
| <b>FJ13</b>                   | 2008 | <i>O. sativa</i> | China       | Fujian               | Zhao <i>et al.</i> , 2012 |
| <b>FJ15</b>                   | 2008 | <i>O. sativa</i> | China       | Fujian               | Zhao <i>et al.</i> , 2012 |
| <b>GX01</b>                   | 2005 | <i>O. sativa</i> | China       | Guangxi              | Zhao <i>et al.</i> , 2012 |
| <b>CFBP 2286 (LMG 797)</b>    | 1964 | <i>O. sativa</i> | Malaysia    | nd                   | CFBP                      |
| <b>CFBP 2287 (NCPPB 2921)</b> | 1973 | <i>O. sativa</i> | Malaysia    | nd                   | CFBP                      |
| <b>BLS28</b>                  | nd   | <i>O. sativa</i> | Philippines | nd                   | Dr C. Vera Cruz           |
| <b>BLS30</b>                  | 1978 | <i>O. sativa</i> | Philippines | College, Laguna      | Dr C. Vera Cruz           |
| <b>BLS53</b>                  | 1981 | <i>O. sativa</i> | Philippines | Polangui, Albay      | Dr C. Vera Cruz           |
| <b>BLS54</b>                  | 1981 | <i>O. sativa</i> | Philippines | Solana, Cagayan      | Dr C. Vera Cruz           |
| <b>BLS55</b>                  | 1981 | <i>O. sativa</i> | Philippines | College, Laguna      | Dr C. Vera Cruz           |
| <b>BLS58</b>                  | 1981 | <i>O. sativa</i> | Philippines | College, Laguna      | Dr C. Vera Cruz           |
| <b>BLS66</b>                  | 1981 | <i>O. sativa</i> | Philippines | Barutac, Iloilo      | Dr C. Vera Cruz           |
| <b>BLS94</b>                  | 1982 | <i>O. sativa</i> | Philippines | College, Laguna      | Dr C. Vera Cruz           |
| <b>BLS98</b>                  | 1982 | <i>O. sativa</i> | Philippines | Nueva Ecija          | Dr C. Vera Cruz           |
| <b>BLS99</b>                  | 1982 | <i>O. sativa</i> | Philippines | Sum-Ag, Bacolod      | Dr C. Vera Cruz           |
| <b>BLS101</b>                 | 1982 | <i>O. sativa</i> | Philippines | Solana, Cagayan      | Dr C. Vera Cruz           |
| <b>BLS103</b>                 | 1983 | <i>O. sativa</i> | Philippines | Baguio, Benguet      | Dr C. Vera Cruz           |
| <b>BLS105</b>                 | 1984 | <i>O. sativa</i> | Philippines | College, Laguna      | Dr C. Vera Cruz           |
| <b>BLS107</b>                 | 1985 | <i>O. sativa</i> | Philippines | Polangui, Albay      | Dr C. Vera Cruz           |
| <b>BLS112</b>                 | 1986 | <i>O. sativa</i> | Philippines | Mintal, Davao        | Dr C. Vera Cruz           |
| <b>BLS125</b>                 | 1987 | <i>O. sativa</i> | Philippines | College, Laguna      | Dr C. Vera Cruz           |
| <b>BLS159</b>                 | 1988 | <i>O. sativa</i> | Philippines | College, Laguna      | Dr C. Vera Cruz           |
| <b>BLS176</b>                 | 1989 | <i>O. sativa</i> | Philippines | North Cotobato       | Dr C. Vera Cruz           |
| <b>BLS256 (CFBP 7109)</b>     | 1984 | <i>O. sativa</i> | Philippines | Los Baños, Laguna    | Dr C. Vera Cruz           |
| <b>BLS279</b>                 | 1984 | <i>O. sativa</i> | Philippines | College, Laguna      | Dr C. Vera Cruz           |
| <b>BLS285</b>                 | 1934 | <i>O. sativa</i> | Philippines | College, Laguna      | Dr C. Vera Cruz           |
| <b>BLS289</b>                 | 1984 | <i>O. sativa</i> | Philippines | Camarines Norte      | Dr C. Vera Cruz           |
| <b>BLS292</b>                 | 1984 | <i>O. sativa</i> | Philippines | Palo, Leyte          | Dr C. Vera Cruz           |
| <b>BLS295</b>                 | 1984 | <i>O. sativa</i> | Philippines | North Cotobato       | Dr C. Vera Cruz           |
| <b>BLS303</b>                 | nd   | <i>O. sativa</i> | Philippines | nd                   | Dr C. Vera Cruz           |
| <b>BLS305</b>                 | 1985 | <i>O. sativa</i> | Philippines | San Dionisio, Iloilo | Dr C. Vera Cruz           |
| <b>BLS333</b>                 | 1985 | <i>O. sativa</i> | Philippines | College, Laguna      | Dr C. Vera Cruz           |
| <b>BLS354</b>                 | 1983 | <i>O. sativa</i> | Philippines | Cabatuan, Isabela    | Dr C. Vera Cruz           |
| <b>BLS368</b>                 | 1921 | <i>O. sativa</i> | Philippines | Tarlac               | Dr C. Vera Cruz           |
| <b>BLS377</b>                 | 1921 | <i>O. sativa</i> | Philippines | Guimba, Nueva        | Dr C. Vera Cruz           |
| <b>BLS404</b>                 | 1994 | <i>O. sativa</i> | Philippines | La Paz, Tarlac       | Dr C. Vera Cruz           |
| <b>BLS415</b>                 | 1994 | <i>O. sativa</i> | Philippines | La Paz, Tarlac       | Dr C. Vera Cruz           |
| <b>BLS417</b>                 | 1994 | <i>O. sativa</i> | Philippines | La Paz, Tarlac       | Dr C. Vera Cruz           |
| <b>BLS418</b>                 | 1994 | <i>O. sativa</i> | Philippines | La Paz, Tarlac       | Dr C. Vera Cruz           |
| <b>BLS419</b>                 | 1994 | <i>O. sativa</i> | Philippines | La Paz, Tarlac       | Dr C. Vera Cruz           |
| <b>BLS420</b>                 | 1994 | <i>O. sativa</i> | Philippines | La Paz, Tarlac       | Dr C. Vera Cruz           |
| <b>BLS423</b>                 | 1994 | <i>O. sativa</i> | Philippines | La Paz, Tarlac       | Dr C. Vera Cruz           |
| <b>BLS500</b>                 | 2009 | <i>O. sativa</i> | Philippines | nd                   | Dr C. Vera Cruz           |
| <b>BLS501</b>                 | 2009 | <i>O. sativa</i> | Philippines | nd                   | Dr C. Vera Cruz           |
| <b>BLS502</b>                 | 2009 | <i>O. sativa</i> | Philippines | nd                   | Dr C. Vera Cruz           |
| <b>BLS503</b>                 | 2009 | <i>O. sativa</i> | Philippines | nd                   | Dr C. Vera Cruz           |
| <b>BLS504</b>                 | 2009 | <i>O. sativa</i> | Philippines | nd                   | Dr C. Vera Cruz           |
| <b>BLS505</b>                 | 2009 | <i>O. sativa</i> | Philippines | nd                   | Dr C. Vera Cruz           |

|                                                                |      |                          |              |                           |                               |
|----------------------------------------------------------------|------|--------------------------|--------------|---------------------------|-------------------------------|
| <b>BLS506</b>                                                  | 2009 | <i>O. sativa</i>         | Philippines  | nd                        | Dr C. Vera Cruz               |
| <b>BLS507</b>                                                  | 2009 | <i>O. sativa</i>         | Philippines  | nd                        | Dr C. Vera Cruz               |
| <b>BLS508</b>                                                  | 2009 | <i>O. sativa</i>         | Philippines  | nd                        | Dr C. Vera Cruz               |
| <b>BLS509</b>                                                  | 2009 | <i>O. sativa</i>         | Philippines  | nd                        | Dr C. Vera Cruz               |
| <b>BLS510</b>                                                  | 2009 | <i>O. sativa</i>         | Philippines  | nd                        | Dr C. Vera Cruz               |
| <b><i>Xanthomonas oryzae</i> pv. <i>oryzae</i> from Africa</b> |      |                          |              |                           |                               |
| <b>BAI1</b>                                                    | 2004 | <i>O. sativa</i>         | Burkina Faso | Centre-Est, Bagré         | Gonzalez <i>et al.</i> , 2007 |
| <b>BAI2</b>                                                    | 2004 | <i>O. sativa</i>         | Burkina Faso | Centre-Est, Bagré         | Gonzalez <i>et al.</i> , 2007 |
| <b>BAI3</b>                                                    | 2004 | <i>O. sativa</i>         | Burkina Faso | Centre-Est, Bagré         | Gonzalez <i>et al.</i> , 2007 |
| <b>BAI4</b>                                                    | 2004 | <i>O. glaberrima</i>     | Burkina Faso | Centre-Est, Bagré         | Gonzalez <i>et al.</i> , 2007 |
| <b>BAI24</b>                                                   | 2009 | <i>O. sativa</i>         | Burkina Faso | Centre-Est, Bagré         | Dr I. Wonni                   |
| <b>BAI25</b>                                                   | 2009 | <i>O. sativa</i>         | Burkina Faso | Centre-Est, Bagré         | Dr I. Wonni                   |
| <b>BAI26</b>                                                   | 2009 | <i>O. sativa</i>         | Burkina Faso | Centre-Est, Bagré         | Dr I. Wonni                   |
| <b>BAI27</b>                                                   | 2009 | <i>O. sativa</i>         | Burkina Faso | Centre-Est, Bagré         | Dr I. Wonni                   |
| <b>BAI28</b>                                                   | 2009 | <i>O. sativa</i>         | Burkina Faso | Centre-Est, Bagré         | Dr I. Wonni                   |
| <b>BAI29</b>                                                   | 2009 | <i>O. sativa</i>         | Burkina Faso | Centre-Est, Bagré         | Dr I. Wonni                   |
| <b>BAI30</b>                                                   | 2009 | <i>O. sativa</i>         | Burkina Faso | Centre-Est, Bagré         | Dr I. Wonni                   |
| <b>BAI31</b>                                                   | 2009 | <i>O. sativa</i>         | Burkina Faso | Centre-Est, Bagré         | Dr I. Wonni                   |
| <b>BAI32</b>                                                   | 2009 | <i>O. sativa</i>         | Burkina Faso | Centre-Est, Bagré         | Dr I. Wonni                   |
| <b>BAI33</b>                                                   | 2009 | <i>O. sativa</i>         | Burkina Faso | Centre-Est, Bagré         | Dr I. Wonni                   |
| <b>BAI45</b>                                                   | 2011 | <i>O. sativa</i>         | Burkina Faso | Boucle du Mouhoun, Sourou | Dr I. Wonni                   |
| <b>BAI46</b>                                                   | 2011 | <i>O. sativa</i>         | Burkina Faso | Boucle du Mouhoun, Sourou | Dr I. Wonni                   |
| <b>BAI50</b>                                                   | 2011 | <i>O. longistaminata</i> | Burkina Faso | Boucle du Mouhoun, Sourou | Dr I. Wonni                   |
| <b>BAI51</b>                                                   | 2011 | <i>O. longistaminata</i> | Burkina Faso | Boucle du Mouhoun, Sourou | Dr I. Wonni                   |
| <b>BAI53</b>                                                   | 2011 | <i>O. longistaminata</i> | Burkina Faso | Boucle du Mouhoun, Sourou | Dr I. Wonni                   |
| <b>BAI54</b>                                                   | 2011 | <i>O. sativa</i>         | Burkina Faso | Boucle du Mouhoun, Sourou | Dr I. Wonni                   |
| <b>BAI55</b>                                                   | 2011 | <i>O. sativa</i>         | Burkina Faso | Boucle du Mouhoun, Sourou | Dr I. Wonni                   |
| <b>BAI56</b>                                                   | 2011 | <i>O. sativa</i>         | Burkina Faso | Boucle du Mouhoun, Sourou | Dr I. Wonni                   |
| <b>BAI57</b>                                                   | 2011 | <i>O. sativa</i>         | Burkina Faso | Boucle du Mouhoun, Sourou | Dr I. Wonni                   |
| <b>BAI58</b>                                                   | 2011 | <i>O. sativa</i>         | Burkina Faso | Boucle du Mouhoun, Sourou | Dr I. Wonni                   |
| <b>BAI59</b>                                                   | 2011 | <i>O. sativa</i>         | Burkina Faso | Boucle du Mouhoun, Sourou | Dr I. Wonni                   |
| <b>CFBP 1947</b>                                               | 1979 | <i>O. sativa</i>         | Cameroon     | Maroua                    | CFBP                          |
| <b>CFBP 1948</b>                                               | 1979 | <i>O. sativa</i>         | Cameroon     | Maroua                    | CFBP                          |
| <b>LMG 12466 (CFBP 1949)</b>                                   | 1979 | <i>O. sativa</i>         | Mali         | Kayes                     | CFBP                          |
| <b>LMG 12467 (CFBP 1951)</b>                                   | 1979 | <i>O. sativa</i>         | Mali         | Kayes                     | CFBP                          |
| <b>MAI1 (CFBP 7325)</b>                                        | 2003 | <i>O. sativa</i>         | Mali         | Office du Niger, Niono    | Gonzalez <i>et al.</i> , 2007 |
| <b>MAI9</b>                                                    | 2004 | <i>O. sativa</i>         | Mali         | Office du Niger, Molodo   | Gonzalez <i>et al.</i> , 2007 |
| <b>MAI14</b>                                                   | 2009 | <i>O. sativa</i>         | Mali         | Office du Niger, Molodo   | LBMA                          |
| <b>MAI15</b>                                                   | 2009 | <i>O. sativa</i>         | Mali         | Office du Niger, Molodo   | LBMA                          |
| <b>MAI55</b>                                                   | 2010 | <i>O. sativa</i>         | Mali         | Office du Niger, Niono    | LBMA                          |
| <b>MAI70</b>                                                   | 2012 | <i>O. sativa</i>         | Mali         | Office du Niger, Niono    | LBMA                          |
| <b>MAI71</b>                                                   | 2012 | <i>O. sativa</i>         | Mali         | Office du Niger, Niono    | LBMA                          |
| <b>MAI73</b>                                                   | 2012 | <i>O. sativa</i>         | Mali         | Office du Niger, Niono    | LBMA                          |
| <b>MAI74</b>                                                   | 2012 | <i>O. sativa</i>         | Mali         | Office du Niger, Niono    | LBMA                          |
| <b>MAI75</b>                                                   | 2012 | <i>O. sativa</i>         | Mali         | Office du Niger, Niono    | LBMA                          |
| <b>MAI95</b>                                                   | 2012 | <i>O. sativa</i>         | Mali         | Office du Niger, Niono    | LBMA                          |
| <b>MAI96</b>                                                   | 2012 | <i>O. sativa</i>         | Mali         | Office du Niger, Niono    | LBMA                          |
| <b>MAI98</b>                                                   | 2012 | <i>O. sativa</i>         | Mali         | Office du Niger, Niono    | LBMA                          |
| <b>MAI99</b>                                                   | 2012 | <i>O. sativa</i>         | Mali         | Office du Niger, Niono    | LBMA                          |
| <b>MAI100</b>                                                  | 2012 | <i>O. sativa</i>         | Mali         | Office du Niger, Niono    | LBMA                          |
| <b>MAI101</b>                                                  | 2012 | <i>O. sativa</i>         | Mali         | Office du Niger, Niono    | LBMA                          |

|                                                                                           |      |                  |            |                                    |                               |
|-------------------------------------------------------------------------------------------|------|------------------|------------|------------------------------------|-------------------------------|
| <b>MAI104</b>                                                                             | 2012 | <i>O. sativa</i> | Mali       | Office du Niger, Niono             | LBMA                          |
| <b>MAI105</b>                                                                             | 2012 | <i>O. sativa</i> | Mali       | Office du Niger, Niono             | LBMA                          |
| <b>MAI106</b>                                                                             | 2012 | <i>O. sativa</i> | Mali       | Office du Niger, Niono             | LBMA                          |
| <b>MAI107</b>                                                                             | 2012 | <i>O. sativa</i> | Mali       | Sikasso, Sélingué                  | LBMA                          |
| <b>MAI108</b>                                                                             | 2012 | <i>O. sativa</i> | Mali       | Sikasso, Sélingué                  | LBMA                          |
| <b>NAI1</b>                                                                               | 2004 |                  | Niger      | Saga                               | Gonzalez <i>et al.</i> , 2007 |
| <b>NAI2</b>                                                                               | 2004 |                  | Niger      | Toula                              | Gonzalez <i>et al.</i> , 2007 |
| <b>NAI3</b>                                                                               | 2004 |                  | Niger      | Bonfeba                            | Gonzalez <i>et al.</i> , 2007 |
| <b>NAI4</b>                                                                               | 2004 |                  | Niger      | Bonfeba                            | Gonzalez <i>et al.</i> , 2007 |
| <b>NAI5</b>                                                                               | 2004 |                  | Niger      | Toula                              | Gonzalez <i>et al.</i> , 2007 |
| <b>NAI6</b>                                                                               | 2004 |                  | Niger      | Toula                              | Gonzalez <i>et al.</i> , 2007 |
| <b>NAI7</b>                                                                               | 2004 |                  | Niger      | Toula                              | Gonzalez <i>et al.</i> , 2007 |
| <b>NAI8</b>                                                                               | 2004 |                  | Niger      | Bonfeba                            | Gonzalez <i>et al.</i> , 2007 |
| <b>NAI9</b>                                                                               | 2004 |                  | Niger      | Bonfeba                            | Gonzalez <i>et al.</i> , 2007 |
| <b><i>Xanthomonas oryzae</i> pv. <i>oryzae</i> from Asia, Australia and Latin America</b> |      |                  |            |                                    |                               |
| <b>R3</b>                                                                                 | nd   | <i>O. sativa</i> | Australia  | nd                                 | Dr J.E. Leach                 |
| <b>Bangladesh</b>                                                                         | nd   | <i>O. sativa</i> | Bangladesh | nd                                 | Dr J.E. Leach                 |
| <b>BanguIXO1</b>                                                                          | nd   | <i>O. sativa</i> | Bangladesh | nd                                 | Dr J.E. Leach                 |
| <b>FXO27 (LMG 9585)</b>                                                                   | nd   | <i>O. sativa</i> | Bolivia    | Sta. Cruz                          | LMG                           |
| <b>BAIYUAN2</b>                                                                           | nd   | <i>O. sativa</i> | China      | nd                                 | Dr J.E. Leach                 |
| <b>FJI#30</b>                                                                             | nd   | <i>O. sativa</i> | China      | Fujian                             | Dr J.E. Leach                 |
| <b>GXO372</b>                                                                             | nd   | <i>O. sativa</i> | China      | nd                                 | Dr J.E. Leach                 |
| <b>HB21</b>                                                                               | nd   | <i>O. sativa</i> | China      | Fungning                           | Dr J.E. Leach                 |
| <b>HN35</b>                                                                               | nd   | <i>O. sativa</i> | China      | nd                                 | Dr J.E. Leach                 |
| <b>HN173</b>                                                                              | nd   | <i>O. sativa</i> | China      | nd                                 | Dr J.E. Leach                 |
| <b>HUB1 #32</b>                                                                           | nd   | <i>O. sativa</i> | China      | Hubei, Wuxue                       | Dr J.E. Leach                 |
| <b>Janling 691 #35</b>                                                                    | nd   | <i>O. sativa</i> | China      | Hubei, Shiaogan                    | Dr J.E. Leach                 |
| <b>SD38</b>                                                                               | nd   | <i>O. sativa</i> | China      | nd                                 | Dr J.E. Leach                 |
| <b>YN9</b>                                                                                | nd   | <i>O. sativa</i> | China      | nd                                 | Dr J.E. Leach                 |
| <b>YN37</b>                                                                               | nd   | <i>O. sativa</i> | China      | nd                                 | Dr J.E. Leach                 |
| <b>CIAT 1185</b>                                                                          | 1982 | <i>O. sativa</i> | Colombia   | nd                                 | Dr J.E. Leach                 |
| <b>A3837</b>                                                                              | nd   | <i>O. sativa</i> | India      | nd                                 | Dr J.E. Leach                 |
| <b>A3842</b>                                                                              | nd   | <i>O. sativa</i> | India      | nd                                 | Dr J.E. Leach                 |
| <b>A3857</b>                                                                              | nd   | <i>O. sativa</i> | India      | nd                                 | Dr J.E. Leach                 |
| <b>A3872 (I13)</b>                                                                        | nd   | <i>O. sativa</i> | India      | Gorgal, Uttar Pradesh              | Dr J.E. Leach                 |
| <b>A3896</b>                                                                              | nd   | <i>O. sativa</i> | India      | nd                                 | Dr J.E. Leach                 |
| <b>CFBP 2532</b>                                                                          | 1965 | <i>O. sativa</i> | India      | nd                                 | Dr J.E. Leach                 |
| <b>Dye YK9 (LMG 5047)</b>                                                                 | nd   | <i>O. sativa</i> | India      | nd                                 | Dr J.E. Leach                 |
| <b>IndiaIXO1</b>                                                                          | nd   | <i>O. sativa</i> | India      | nd                                 | Dr J.E. Leach                 |
| <b>FXO43 (LMG 9589)</b>                                                                   | nd   | <i>O. sativa</i> | Indonesia  | nd                                 | Dr J.E. Leach                 |
| <b>IXO16</b>                                                                              | nd   | <i>O. sativa</i> | Indonesia  | Ciranjans, West Java               | Dr J.E. Leach                 |
| <b>IXO57</b>                                                                              | nd   | <i>O. sativa</i> | Indonesia  | nd                                 | Dr J.E. Leach                 |
| <b>IXO60</b>                                                                              | nd   | <i>O. sativa</i> | Indonesia  | nd                                 | Dr J.E. Leach                 |
| <b>LMG 648</b>                                                                            | nd   | <i>O. sativa</i> | Japan      | nd                                 | LMG                           |
| <b>KOO367</b>                                                                             | nd   | <i>O. sativa</i> | Korea      | nd                                 | Dr J.E. Leach                 |
| <b>KXO212</b>                                                                             | nd   | <i>O. sativa</i> | Korea      | nd                                 | Dr J.E. Leach                 |
| <b>TY818</b>                                                                              | nd   | <i>O. sativa</i> | Korea      | nd                                 | Dr J.E. Leach                 |
| <b>XOO214</b>                                                                             | nd   | <i>O. sativa</i> | Korea      | nd                                 | Dr J.E. Leach                 |
| <b>MB18</b>                                                                               | nd   | <i>O. sativa</i> | Malaysia   | nd                                 | Dr J.E. Leach                 |
| <b>MXO90</b>                                                                              | nd   | <i>O. sativa</i> | Malaysia   | Mardi, S. Perai,                   | Dr J.E. Leach                 |
| <b>MXO92</b>                                                                              | nd   | <i>O. sativa</i> | Malaysia   | nd                                 | Dr J.E. Leach                 |
| <b>MXO99</b>                                                                              | nd   | <i>O. sativa</i> | Malaysia   | Jln. Kg Paya,Pulau Sayap,<br>Kedah | Dr J.E. Leach                 |

|                           |      |                  |             |                                |                            |
|---------------------------|------|------------------|-------------|--------------------------------|----------------------------|
| <b>MXO300</b>             | nd   | <i>O. sativa</i> | Malaysia    | Mada Kodiang, Kedah            | Dr J.E. Leach              |
| <b>0913Xoo</b>            | nd   | <i>O. sativa</i> | Myanmar     | nd                             | Dr J.E. Leach              |
| <b>B37Xoo</b>             | nd   | <i>O. sativa</i> | Myanmar     | nd                             | Dr J.E. Leach              |
| <b>R13</b>                | nd   | <i>O. sativa</i> | Myanmar     | nd                             | Dr J.E. Leach              |
| <b>FXO38 (LMG 9588)</b>   | nd   | <i>O. sativa</i> | Nepal       | nd                             | Dr J.E. Leach              |
| <b>NXO537</b>             | nd   | <i>O. sativa</i> | Nepal       | nd                             | Dr J.E. Leach              |
| <b>NXO544</b>             | nd   | <i>O. sativa</i> | Nepal       | Dhanusa                        | Dr J.E. Leach              |
| <b>NXO588</b>             | nd   | <i>O. sativa</i> | Nepal       | Jhapa                          | Dr J.E. Leach              |
| <b>NXO604</b>             | nd   | <i>O. sativa</i> | Nepal       | Chitwan                        | Dr J.E. Leach              |
| <b>NXO622</b>             | nd   | <i>O. sativa</i> | Nepal       | nd                             | Dr J.E. Leach              |
| <b>NXO624</b>             | nd   | <i>O. sativa</i> | Nepal       | Tanahua                        | Dr J.E. Leach              |
| <b>NXO638</b>             | 1978 | <i>O. sativa</i> | Nepal       | Rupendhi                       | Dr J.E. Leach              |
| <b>PXO35 (LMG 9602)</b>   | 1972 | <i>O. sativa</i> | Philippines | Culape, Lucban, Quezon         | Leach <i>et al.</i> , 1992 |
| <b>PXO36 (LMG 9603)</b>   | 1972 | <i>O. sativa</i> | Philippines | Tilib, Lucban, Quezon          | Leach <i>et al.</i> , 1992 |
| <b>PXO61 (CFBP 7201)</b>  | 1973 | <i>O. sativa</i> | Philippines | Los Baños, Laguna              | Leach <i>et al.</i> , 1992 |
| <b>PXO68 (LMG 9604)</b>   | 1974 | <i>O. sativa</i> | Philippines | Palawan                        | Leach <i>et al.</i> , 1992 |
| <b>PXO69</b>              | 1974 | <i>O. sativa</i> | Philippines | Palawan                        | Leach <i>et al.</i> , 1992 |
| <b>PXO71 (CFBP 1946)</b>  | 1979 | <i>O. sativa</i> | Philippines | Palawan                        | Leach <i>et al.</i> , 1992 |
| <b>PXO78 (LMG 9608)</b>   | 1975 | <i>O. sativa</i> | Philippines | Ajuy, Iloilo                   | Leach <i>et al.</i> , 1992 |
| <b>PXO79 (CFBP 1981)</b>  | 1975 | <i>O. sativa</i> | Philippines | Davao                          | Leach <i>et al.</i> , 1992 |
| <b>PXO83 (LMG 9610)</b>   | 1976 | <i>O. sativa</i> | Philippines | Nueva Ecija                    | Leach <i>et al.</i> , 1992 |
| <b>PXO86 (CFBP 7202)</b>  | 1977 | <i>O. sativa</i> | Philippines | Los Baños, Laguna              | Leach <i>et al.</i> , 1992 |
| <b>PXO87 (LMG 9615)</b>   | 1974 | <i>O. sativa</i> | Philippines | Isabela                        | Leach <i>et al.</i> , 1992 |
| <b>PXO99 (CFBP 7203)</b>  | 1980 | <i>O. sativa</i> | Philippines | Los Baños, Laguna              | Leach <i>et al.</i> , 1992 |
| <b>PXO112</b>             | 1978 | <i>O. sativa</i> | Philippines | Banaue, Ifugao                 | Leach <i>et al.</i> , 1992 |
| <b>PXO114 (LMG 9623)</b>  | 1979 | <i>O. sativa</i> | Philippines | Los Baños, Laguna              | Leach <i>et al.</i> , 1992 |
| <b>PXO132 (LMG 9601)</b>  | 1979 | <i>O. sativa</i> | Philippines | Buguey, Cagayan                | Leach <i>et al.</i> , 1992 |
| <b>PXO137 (LMG 9609)</b>  | 1982 | <i>O. sativa</i> | Philippines | Midsayap, North Cotabato       | Leach <i>et al.</i> , 1992 |
| <b>PXO141 (LMG 9613)</b>  | 1982 | <i>O. sativa</i> | Philippines | Brces, Pili, Camarines Sur     | Leach <i>et al.</i> , 1992 |
| <b>PXO142 (LMG 9612)</b>  | 1981 | <i>O. sativa</i> | Philippines | Panabo, Davao                  | Leach <i>et al.</i> , 1992 |
| <b>PXO143 (LMG 9614)</b>  | 1974 | <i>O. sativa</i> | Philippines | Lopez, Bohol                   | Leach <i>et al.</i> , 1992 |
| <b>PXO145</b>             | 1981 | <i>O. sativa</i> | Philippines | Bontoc, Mt. Province           | Leach <i>et al.</i> , 1992 |
| <b>PXO154 (LMG 9621)</b>  | 1981 | <i>O. sativa</i> | Philippines | IRCTN, Banaue, Ifugao          | Leach <i>et al.</i> , 1992 |
| <b>PXO155</b>             | 1981 | <i>O. sativa</i> | Philippines | nd                             | Leach <i>et al.</i> , 1992 |
| <b>PXO156</b>             | 1979 | <i>O. sativa</i> | Philippines | nd                             | Leach <i>et al.</i> , 1992 |
| <b>PXO157 (LMG 9605)</b>  | 1985 | <i>O. sativa</i> | Philippines | Casigan, Narra, Palawan        | Leach <i>et al.</i> , 1992 |
| <b>PXO164 (LMG 9616)</b>  | 1979 | <i>O. sativa</i> | Philippines | Polangui, Albay                | Leach <i>et al.</i> , 1992 |
| <b>PXO165</b>             | 1982 | <i>O. sativa</i> | Philippines | Malicboy, Pagbilao, Quezon     | Leach <i>et al.</i> , 1992 |
| <b>PXO170 (LMG 9606)</b>  | 1984 | <i>O. sativa</i> | Philippines | Malinao, Narra, Palawan        | Leach <i>et al.</i> , 1992 |
| <b>PXO171 (LMG 9611)</b>  | 1984 | <i>O. sativa</i> | Philippines | San Enrique, Negros Occidental | Leach <i>et al.</i> , 1992 |
| <b>PXO176 (LMG 9617)</b>  | 1986 | <i>O. sativa</i> | Philippines | Sorsogon, Sorsogon             | Leach <i>et al.</i> , 1992 |
| <b>PXO177 (LMG 9618)</b>  | 1986 | <i>O. sativa</i> | Philippines | Pawa, Tabaco, Albay            | Leach <i>et al.</i> , 1992 |
| <b>PXO183 (LMG 9622)</b>  | 1986 | <i>O. sativa</i> | Philippines | Banaue, Ifugao                 | Leach <i>et al.</i> , 1992 |
| <b>PXO201</b>             | 1994 | <i>O. sativa</i> | Philippines | nd                             | Leach <i>et al.</i> , 1992 |
| <b>PXO342</b>             | 1994 | <i>O. sativa</i> | Philippines | Calauan, Laguna                | Dr C. Vera Cruz            |
| <b>PXO345 (CFBP 7210)</b> | 1994 | <i>O. sativa</i> | Philippines | Mabitac, Laguna                | Dr C. Vera Cruz            |

|                              |      |                  |             |                 |                 |
|------------------------------|------|------------------|-------------|-----------------|-----------------|
| <b>PXO346</b>                | 1994 | <i>O. sativa</i> | Philippines | Mabitac, Laguna | Dr C. Vera Cruz |
| <b>PXO347</b>                | 1994 | <i>O. sativa</i> | Philippines | Mabitac, Laguna | Dr C. Vera Cruz |
| <b>PXO349</b>                | nd   | <i>O. sativa</i> | Philippines | Calauan, Laguna | Dr C. Vera Cruz |
| <b>PXO351</b>                | 1995 | <i>O. sativa</i> | Philippines | nd              | Dr C. Vera Cruz |
| <b>PXO354</b>                | 1993 | <i>O. sativa</i> | Philippines | Calauan, Laguna | Dr C. Vera Cruz |
| <b>PXO357</b>                | 1993 | <i>O. sativa</i> | Philippines | Calauan, Laguna | Dr C. Vera Cruz |
| <b>PXO378</b>                | 1993 | <i>O. sativa</i> | Philippines | Calauan, Laguna | Dr C. Vera Cruz |
| <b>PXO379</b>                | 1993 | <i>O. sativa</i> | Philippines | Calauan, Laguna | Dr C. Vera Cruz |
| <b>PXO418</b>                | 1994 | <i>O. sativa</i> | Philippines | Calauan, Laguna | Dr C. Vera Cruz |
| <b>PXO421</b>                | 1994 | <i>O. sativa</i> | Philippines | Calauan, Laguna | Dr C. Vera Cruz |
| <b>PXO448</b><br>(CFBP 7211) | 1994 | <i>O. sativa</i> | Philippines | Mabitac, Laguna | Dr C. Vera Cruz |
| <b>PXO508</b>                | 1994 | <i>O. sativa</i> | Philippines | Calauan, Laguna | Dr C. Vera Cruz |
| <b>PXO513</b>                | 1994 | <i>O. sativa</i> | Philippines | Calauan, Laguna | Dr C. Vera Cruz |
| <b>PXO520</b>                | 1994 | <i>O. sativa</i> | Philippines | Calauan, Laguna | Dr C. Vera Cruz |
| <b>PXO555</b>                | 1995 | <i>O. sativa</i> | Philippines | Calauan, Laguna | Dr C. Vera Cruz |
| <b>PXO559</b>                | 1995 | <i>O. sativa</i> | Philippines | Calauan, Laguna | Dr C. Vera Cruz |
| <b>PXO560</b>                | 1995 | <i>O. sativa</i> | Philippines | Calauan, Laguna | Dr C. Vera Cruz |
| <b>PXO561</b>                | 1995 | <i>O. sativa</i> | Philippines | Calauan, Laguna | Dr C. Vera Cruz |
| <b>PXO562</b>                | 1998 | <i>O. sativa</i> | Philippines | Calauan, Laguna | Dr C. Vera Cruz |
| <b>PXO563</b>                | 1998 | <i>O. sativa</i> | Philippines | Calauan, Laguna | Dr C. Vera Cruz |
| <b>PXO565</b>                | 1999 | <i>O. sativa</i> | Philippines | Calauan, Laguna | Dr C. Vera Cruz |
| <b>PXO566</b>                | 1999 | <i>O. sativa</i> | Philippines | Calauan, Laguna | Dr C. Vera Cruz |
| <b>PXO567</b>                | 1999 | <i>O. sativa</i> | Philippines | Calauan, Laguna | Dr C. Vera Cruz |
| <b>PXO568</b>                | 2002 | <i>O. sativa</i> | Philippines | Calauan, Laguna | Dr C. Vera Cruz |
| <b>PXO570</b>                | 2003 | <i>O. sativa</i> | Philippines | Calauan, Laguna | Dr C. Vera Cruz |
| <b>PXO571</b>                | 2002 | <i>O. sativa</i> | Philippines | Calauan, Laguna | Dr C. Vera Cruz |
| <b>PXO572</b>                | 2002 | <i>O. sativa</i> | Philippines | Calauan, Laguna | Dr C. Vera Cruz |
| <b>PXO573</b>                | 2002 | <i>O. sativa</i> | Philippines | Calauan, Laguna | Dr C. Vera Cruz |
| <b>PXO575</b>                | 2002 | <i>O. sativa</i> | Philippines | Calauan, Laguna | Dr C. Vera Cruz |
| <b>PXO576</b>                | 2003 | <i>O. sativa</i> | Philippines | Calauan, Laguna | Dr C. Vera Cruz |
| <b>PXO577</b>                | 2003 | <i>O. sativa</i> | Philippines | Calauan, Laguna | Dr C. Vera Cruz |
| <b>PXO578</b>                | 2003 | <i>O. sativa</i> | Philippines | Calauan, Laguna | Dr C. Vera Cruz |
| <b>PXO579</b>                | 2004 | <i>O. sativa</i> | Philippines | Calauan, Laguna | Dr C. Vera Cruz |
| <b>PXO580</b>                | 2004 | <i>O. sativa</i> | Philippines | Calauan, Laguna | Dr C. Vera Cruz |
| <b>PXO581</b>                | 2004 | <i>O. sativa</i> | Philippines | Calauan, Laguna | Dr C. Vera Cruz |
| <b>CLI</b>                   | nd   | <i>O. sativa</i> | Sri Lanka   | nd              | Dr J.E. Leach   |
| <b>Ecyl</b>                  | nd   | <i>O. sativa</i> | Sri Lanka   | nd              | Dr J.E. Leach   |
| <b>XO03</b>                  | nd   | <i>O. sativa</i> | Thailand    | nd              | Dr J.E. Leach   |
| <b>XO04</b>                  | nd   | <i>O. sativa</i> | Thailand    | nd              | Dr J.E. Leach   |
| <b>XO05</b>                  | nd   | <i>O. sativa</i> | Thailand    | nd              | Dr J.E. Leach   |
| <b>XO08</b>                  | nd   | <i>O. sativa</i> | Thailand    | nd              | Dr J.E. Leach   |
| <b>XO010</b>                 | nd   | <i>O. sativa</i> | Thailand    | nd              | Dr J.E. Leach   |
| <b>XO011</b>                 | nd   | <i>O. sativa</i> | Thailand    | nd              | Dr J.E. Leach   |
| <b>XO012</b>                 | nd   | <i>O. sativa</i> | Thailand    | nd              | Dr J.E. Leach   |

PXO = Philippine *X. oryzae* pv. *oryzae* strain collection and BLS = Philippine *X. oryzae* pv. *oryzicola* strain collection from the International Rice Research Institute (IRRI), Los Baños, Philippines; CIAT = Lab Rice Pathology collection of the Centro Internacional de Agricultura Tropical (CIAT), Cali, Colombia; CFBP = Collection Française de Bactéries Phytopathogènes, INRA, Angers, France; NCPPB = National Collection of Plant-Pathogenic Bacteria, United Kingdom; LMG = Laboratorium voor Microbiologie, Universiteit Gent, Belgium; LBMA = Laboratoire Biologie Moléculaire Appliquée, Bamako, Mali.



**TABLE S2** Characteristics of 33 sequenced VNTR loci

| Locus  | Primer #1          | Primer #2           | <i>Xoo</i> -Africa          |                |                            |                         | <i>Xoo</i> -Asia |                |               |            | <i>Xoc</i>     |                |               |            |                       |
|--------|--------------------|---------------------|-----------------------------|----------------|----------------------------|-------------------------|------------------|----------------|---------------|------------|----------------|----------------|---------------|------------|-----------------------|
|        |                    |                     | No. of samples <sup>a</sup> | No. of alleles | Allelic range <sup>b</sup> | HGDI score <sup>c</sup> | No. of samples   | No. of alleles | Allelic range | HGDI score | No. of samples | No. of alleles | Allelic range | HGDI score | Old name <sup>d</sup> |
| Xo_G02 | AGGCGGCGTTGCATCGTG | AACAGCGGCGTGCCGATG  | 20/20                       | 3              | 2-4                        | 0.47                    |                  |                |               |            | 20/20          | 7              | 3-9           | 0.78       | B02                   |
| Xo_G06 | GCAGACGGATGGGCGTTG | CGCTGTGCGGCAGGGTTTG | 20/20                       | 2              | 4-5                        | 0.39                    | 20/20            | 7              | 4-12          | 0.83       | 20/20          | 5              | 5-9           | 0.72       | B05                   |
| Xo_G07 | CAGGGCGAACGCGATGAG | GCTCCATGGTGCCGGAGA  | 20/20                       | 6              | 4-13                       | 0.71                    | 5/20             | 3              | 1-7           | 0.80       | 20/20          | 5              | 5-10          | 0.73       | M08                   |
| Xo_G09 | GGAATGCCGAAGCGCTCG | TGCTCGACCTGGAAGGCG  |                             |                |                            |                         |                  |                |               |            | 20/20          | 9              | 2-32          | 0.79       | B06                   |
| Xo_G15 | GGATCTGCACGGCGCCAC | CGCCTTGTCGATCCGCA   | 5/5                         | 1              | 3                          | 0                       | 4/20             | 4              | 11-40         | 1          | 20/20          | 7              | 3-11          | 0.85       | B14                   |
| Xo_G16 | TGGATCAGCGTGACCGGC | TCGCCACCTCGTTCACGC  |                             |                |                            |                         | 4/20             | 3              | 3-6           | 0.83       | 18/20          | 5              | 5-10          | 0.71       | B13                   |
| Xo_G20 | CGACACCGGTGGCATCCT | GTGCCGGTGACCGTCAGC  |                             |                |                            |                         | 20/20            | 8              | 10-18         | 0.78       |                |                |               |            |                       |
| Xo_G25 | GCTGGCGGTGACCACCAC | GTCCAGCAGGTGCTCGCG  | 20/20                       | 5              | 4-9                        | 0.51                    | 20/20            | 6              | 1-10          | 0.78       | 0/4            |                |               |            |                       |
| Xo_G27 | GTGAGCGAGGTACGGCGG | GGTGGCGTCCATCCTTGG  |                             |                |                            |                         | 20/20            | 9              | 4-20          | 0.91       |                |                |               |            |                       |
| Xo_G44 | GCCGTGCTTCCGTCTGCA | CCGCATCCATCGCGACAG  | 20/20                       | 3              | 2-5                        | 0.48                    | 20/20            | 4              | 4-7           | 0.56       | 19/20          | 3              | 2-5           | 0.50       |                       |
| Xo_G52 | GCACAGCAGCCACGGCAA | GCGTGGACGGATGCCAGC  |                             |                |                            |                         |                  |                |               |            | 19/20          | 7              | 7-14          | 0.80       | B01                   |
| Xo_G53 | CGCCAGCCAGAACGACA  | GCTGGCGGTGACCACCAC  | 20/20                       | 4              | 5-10                       | 0.50                    | 20/20            | 6              | 2-15          | 0.77       | 0/4            |                |               |            |                       |
| Xo_G55 | ACCCGGCAACTCGCAACC | GGCAGAGCAAGCGGCAT   | 20/20                       | 5              | 11-23                      | 0.73                    |                  |                |               |            | 20/20          | 9              | 5-17          | 0.86       | B21                   |
| Xo_G58 | CAACGAGGTGCCCGGCAA | GGAGCGGCACATCATCG   | 19/20                       | 5              | 3-7                        | 0.64                    | 20/20            | 5              | 1-5           | 0.80       | 20/20          | 6              | 3-9           | 0.77       |                       |
| Xo_G59 | CTGCCGGCCTTGCCCAAG | ATGCTTGCGGTCCACGG   | 20/20                       | 4              | 4-8                        | 0.49                    |                  |                |               |            | 20/20          | 6              | 3-8           | 0.74       | B11                   |
| Xo_G60 | GTTGCCGCCCGGTAC    | CGGCGTCTTGCCAACCCT  | 20/20                       | 4              | 3-7                        | 0.63                    | 9/9              | 3              | 1-3           | 0.56       | 20/20          | 2              | 2-3           | 0.48       |                       |
| Xo_G62 | TGGCCTGATCGTGCGTCA | ACGACAAGCAGCGCCTGC  | 20/20                       | 2              | 5-6                        | 0.51                    | 11/20            | 3              | 2-4           | 0.62       | 4/4            | 1              | 3             | 0          |                       |
| Xo_G67 | GCTTGGCGGGTCACATCG | TGGATCGACCCGGACTG   | 20/20                       | 2              | 3-4                        | 0.44                    | 6/6              | 1              | 2             | 0          | 20/20          | 13             | 6-49          | 0.95       | B20                   |
| Xo_G70 | GGCTCGTCTACGGAGC   | TGGAACACGGCTGCGTGC  |                             |                |                            |                         |                  |                |               |            | 20/20          | 5              | 3-8           | 0.65       | B03                   |
| Xo_G71 | CGTCGGCCGCAAGTACG  | GTCTCGGACACGCGCACG  |                             |                |                            |                         |                  |                |               |            | 20/20          | 4              | 5-8           | 0.66       | B04                   |
| Xo_G73 | GCGGTGGGCAGCGATGTC | ATGGTTGTGGTGCGGCGG  |                             |                |                            |                         |                  |                |               |            | 20/20          | 5              | 2-6           | 0.69       | B08                   |
| Xo_G74 | CGCGCCGATCACGCCTTG | GGCCACAAACGCAACCCG  |                             |                |                            |                         |                  |                |               |            | 20/20          | 4              | 4-7           | 0.36       | B09                   |
| Xo_G75 | GCGCTACACCGGCTTCGC | ATCGGAACGTGGCTGCGC  |                             |                |                            |                         |                  |                |               |            | 20/20          | 3              | 3-6           | 0.51       | B10                   |
| Xo_G77 | CCGACCAATGCCGAGCAG | CCAGTCTTCGGCCAGCG   |                             |                |                            |                         |                  |                |               |            | 20/20          | 4              | 3-6           | 0.63       | B15                   |

|        |                    |                     |  |  |  |  |       |   |     |      |       |   |       |      |     |
|--------|--------------------|---------------------|--|--|--|--|-------|---|-----|------|-------|---|-------|------|-----|
| Xo_G78 | GCTCGGCCACGAAGCTGC | GCGCATGAAGCAGGTCGG  |  |  |  |  |       |   |     |      | 19/20 | 2 | 5-6   | 0.53 | B16 |
| Xo_G79 | AGGCAGGCGAAATCGGCG | ACGCCGAGGAAGCCGGTG  |  |  |  |  |       |   |     |      | 20/20 | 8 | 13-47 | 0.79 | B17 |
| Xo_G80 | ACGGATGGCGTTGGCCAG | TCGGCATGATCCTGGGCG  |  |  |  |  | 20/20 | 2 | 1-2 | 0.51 | 19/20 | 6 | 3-11  | 0.74 | B18 |
| Xo_G81 | GAAACAGGCGCGGCGTCA | CTGACCGGCGTGCTGCTG  |  |  |  |  | 12/20 | 1 | 2   | 0    | 20/20 | 7 | 3-14  | 0.79 | B19 |
| Xo_G83 | ACAGGCATCGGCCGATTC | GGGGTCTGCTGGGTGCGAC |  |  |  |  | 20/20 | 2 | 3-4 | 0.39 | 20/20 | 4 | 3-6   | 0.65 | G04 |
| Xo_G84 | CAGCACAGCGATCGCCTG | CAGGGGCTGCGCAGCTAC  |  |  |  |  |       |   |     |      | 18/20 | 5 | 4-9   | 0.71 | G05 |
| Xo_G85 | GGACACCATGCCCGTCGG | CTCAGTGCCGGCGTGCGAG |  |  |  |  |       |   |     |      | 20/20 | 5 | 4-10  | 0.82 | G09 |
| Xo_G86 | AGCCCCACCCAATCACGC | ACGCGGAGCAAAAAGGCGT |  |  |  |  |       |   |     |      | 20/20 | 3 | 3-6   | 0.48 | G11 |
| Xo_G87 | CGCAGATGCTCGTTGCCG | CGATGCGACGCTGGATGC  |  |  |  |  |       |   |     |      | 20/20 | 3 | 4-6   | 0.70 | M01 |

<sup>a</sup> Number of strains for which DNA sequences were obtained / number of strains that were analyzed by PCR, indicating success of PCR.

<sup>b</sup> Alleles with the smallest number and with the largest number of repeats.

<sup>c</sup> HGDI, Hunter-Gaston Discriminatory Index.

<sup>d</sup> For comparison, locus names used in a previous publication are given (Zhao *et al.*, 2012).

The test panels consisted of 12 to 14 strains representing worldwide diversity to evaluate the conservation of loci (diversity panel) and 6 to 8 presumably related strains to elucidate the resolution (stability panel):

African *X. oryzae* pv. *oryzae* diversity panel: BAI1, BAI3, BAI4, BAI27, BAI29, BAI32, CFBP 1947, CFBP 1949, CFBP 1951, MAI1, MAI9, MAI14, NAI1, NAI8;

African *X. oryzae* pv. *oryzae* stability panel: NAI2, NAI3, NAI4, NAI5, NAI7, NAI9;

Asian *X. oryzae* pv. *oryzae* diversity panel: A3842, CFBP 2532, CFBP 2532, HN173, IXO57, NXO537, NXO622, PXO99, PXO112, TY818, XOO212, YN37;

Asian *X. oryzae* pv. *oryzae* stability panel: CIAT1185, PXO61, PXO86, PXO145, PXO378, PXO555, PXO566, PXO577;

*X. oryzae* pv. *oryzicola* diversity panel: Africa: MAI3, MAI 4, MAI5, MAI7, MAI8, MAI10, MAI11; Asia: BLS256, CFBP 2286, CFBP 2287, FJ15, GX01, GX07, UPB497;

*X. oryzae* pv. *oryzicola* stability panel: Africa: MAI18, MAI19, MAI21; Asia: FJ11, FJ12, FJ13.

**TABLE S3** Allelic richness and private allelic richness per locus and per lineage

| Locus                       | Allelic richness   |                  |            | Private allelic richness |                  |            |
|-----------------------------|--------------------|------------------|------------|--------------------------|------------------|------------|
|                             | <i>Xoo</i> -Africa | <i>Xoo</i> -Asia | <i>Xoc</i> | <i>Xoo</i> -Africa       | <i>Xoo</i> -Asia | <i>Xoc</i> |
| <b>Average over 16 loci</b> | <b>4.2</b>         | <b>9.4</b>       | <b>9.1</b> | <b>1</b>                 | <b>3.8</b>       | <b>4.8</b> |
| Xo_G06                      | 4                  | 7.6              | 6.7        | 0                        | 3                | 1.1        |
| Xo_G07                      | 8                  | -                | 7.7        | 0                        | -                | 0          |
| Xo_G58                      | 6                  | 7.1              | 9.6        | 1.4                      | 0                | 4.3        |
| Xo_G81                      | 4                  | 4.9              | 16         | 1                        | 0.8              | 11.7       |
| Xo_G2553                    | 5                  | 11.7             | 1.6        | 5                        | 11.7             | 1.6        |
| Xo_G88                      | 7                  | 12.5             | 1          | 1                        | 6.5              | <u>1</u>   |
| Xo_G44                      | 5                  | 7.4              | 3          | 1                        | 3.7              | 0          |
| Xo_G62                      | 3                  | 4                | 1.6        | 2                        | 1.4              | 0          |
| Xo_G55                      | 8                  | 1.7              | 18.4       | 0.4                      | 1                | 11.5       |
| Xo_G59                      | 5                  | 3.7              | 5.6        | 1                        | 1                | 1.6        |
| Xo_G60                      | 5                  | 3                | 3.8        | 2.2                      | 1                | 0          |
| Xo_G67                      | 2                  | 1.7              | 23.1       | 1.3                      | 1                | 23.1       |
| Xo_G09                      | 1                  | 22               | 22.9       | <u>0</u>                 | 6.5              | 7.1        |
| Xo_G15                      | 1                  | 29.3             | 13.1       | <u>0.1</u>               | 22.4             | 6.3        |
| Xo_G80                      | 1                  | 4.2              | 8.6        | <u>0.3</u>               | 0.8              | 5.9        |
| Xo_G83                      | 2                  | 2.8              | 3.3        | 0                        | 0                | 0.8        |

Underlined values indicate private alleles for monomorphic loci.

- indicates that no useful PCR amplicon was obtained due to the insertion of an IS element.

**TABLE S4** DAPC groups per lineage and number of strains originating from the different countries

| <b>Lineage</b>                | <b>DAPC groups per lineage</b> | <b>Number of strains per country in each DAPC group</b>                                                                                                                                                                                                |
|-------------------------------|--------------------------------|--------------------------------------------------------------------------------------------------------------------------------------------------------------------------------------------------------------------------------------------------------|
| <b>African<br/><i>Xoo</i></b> | <b>DAPC-<i>XooAf1a</i>*</b>    | 17 strains from Mali (2010 & 2012)                                                                                                                                                                                                                     |
|                               | <b>DAPC-<i>XooAf1b</i>*</b>    | 6 strains from Mali (1979, 2003 & 2009)                                                                                                                                                                                                                |
|                               | <b>DAPC-<i>XooAf2</i></b>      | 2 strains from Cameroon & 1 strain from Burkina Faso (BAI4)                                                                                                                                                                                            |
|                               | <b>DAPC-<i>XooAf3</i></b>      | 24 strains from Burkina Faso & 9 strains from Niger.                                                                                                                                                                                                   |
| <b>Asian<br/><i>Xoo</i></b>   | <b>DAPC-<i>XooAs1</i></b>      | 50 Philippine strains, 11 Chinese strains, 5 Malaysian strains, 4 Indonesian strains, 7 Thai strains, 3 Burmese strains, 3 Korean strains, Nepalese strains, 1 strain from Sri Lanka, 1 strain from Australia (R3) & 1 strain from Colombia (CIAT1185) |
|                               | <b>DAPC-<i>XooAs2</i></b>      | 19 Philippine strains, 8 Indian strains, 2 Bangladesh strains, 2 Nepalese strains, 1 Japanese strain, 1 Korean strain, 1 strain from Sri Lanka and 1 strain from Bolivia (FXO27)                                                                       |
| <b><i>Xoc</i></b>             | <b>DAPC-<i>Xoc1</i></b>        | 70 African strains, 3 Chinese strains ( <i>Xoc-china</i> , GXO1, HN-DA-1) & 3 Philippine strains (BLS103, BLS419, BLS489)                                                                                                                              |
|                               | <b>DAPC-<i>Xoc2</i></b>        | 76 Asian strains                                                                                                                                                                                                                                       |

\*When DAPC analysis was run from African *Xoo* MLVA-16 data with K=4 (inferring 4 ancestral groups), the group DAPC-*XooAf1* was further subdivided into *XooAf1a* and *XooAf1b*.

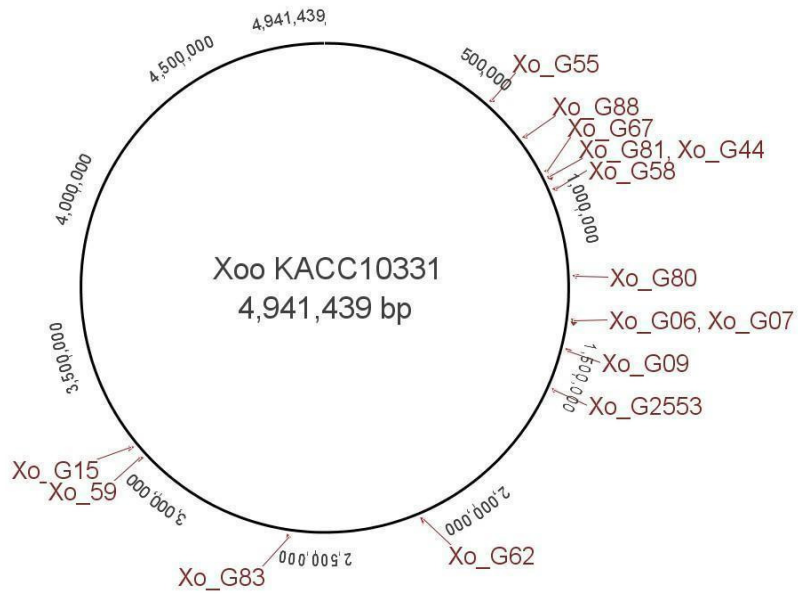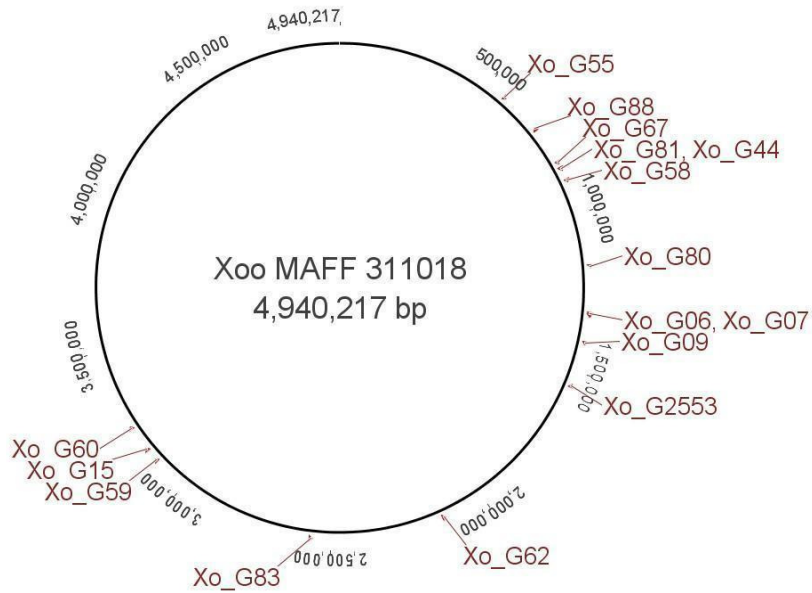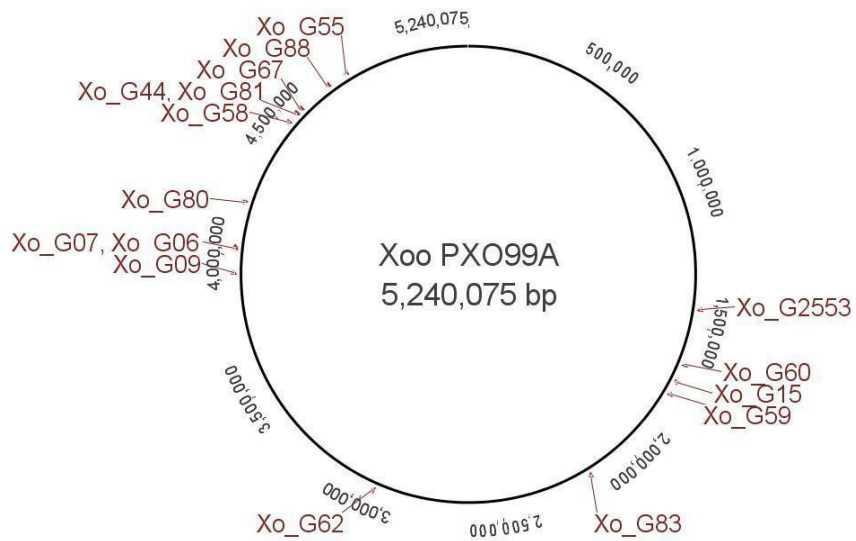

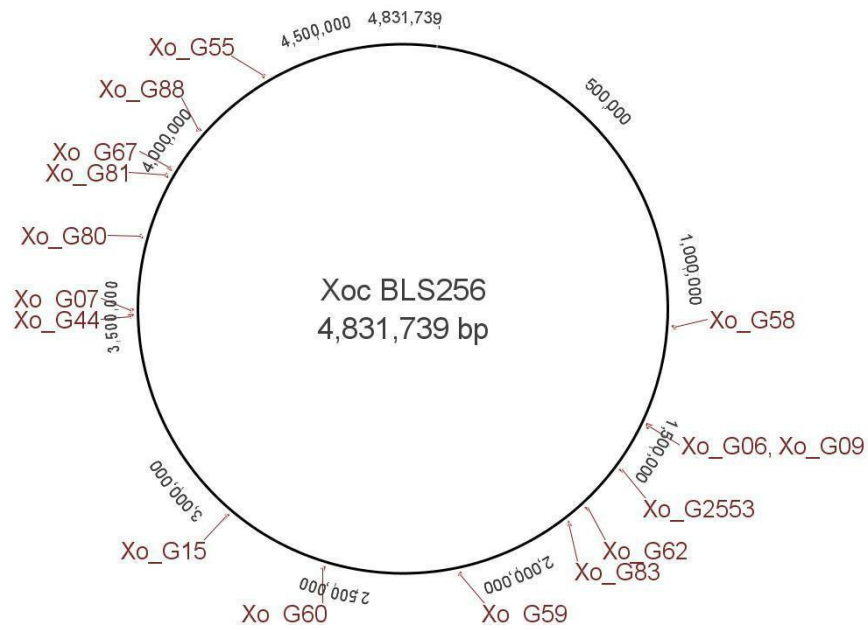

**FIG S1** Physical positions of 16 VNTR loci on the chromosomes of completely sequenced *Xanthomonas oryzae* strains: *X. oryzae* pv. *oryzae* strain KACC 103331, *X. oryzae* pv. *oryzae* strain MAFF311018, *X. oryzae* pv. *oryzae* strain PXO99<sup>A</sup>, and *X. oryzae* pv. *oryzicola* strain BLS256.

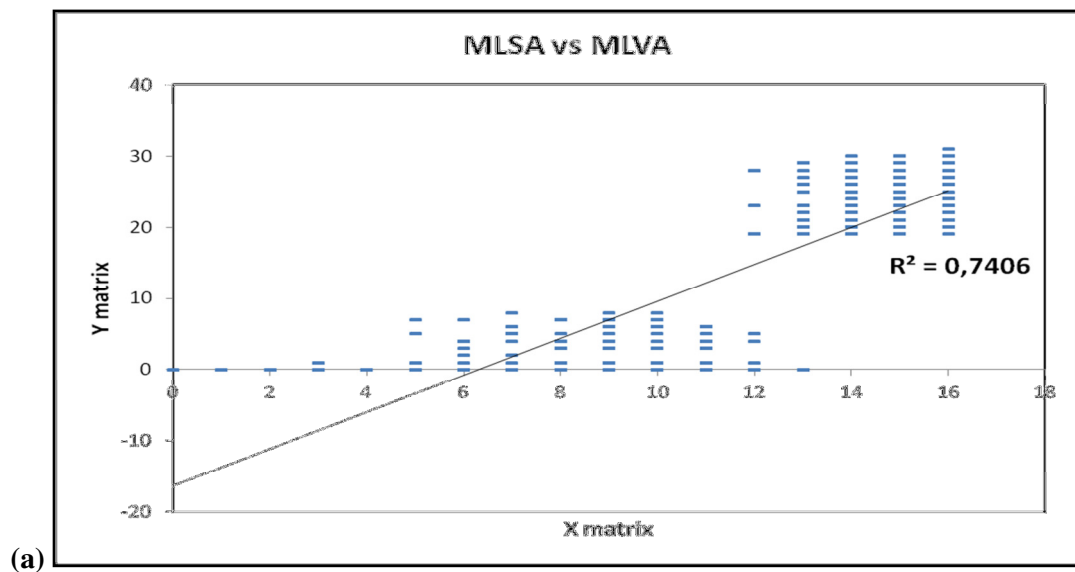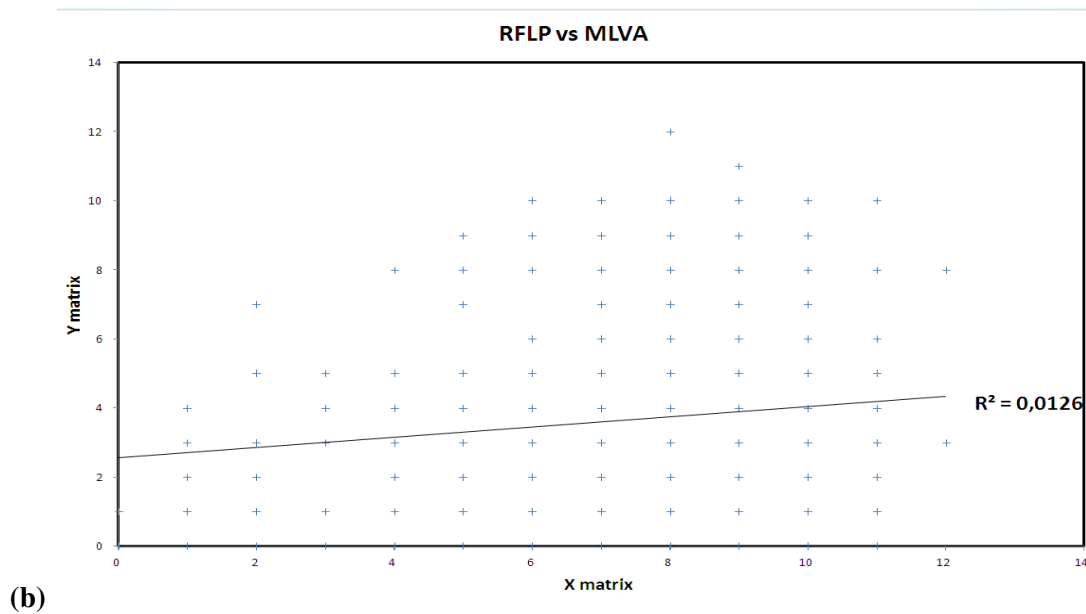

**FIG S2** Linear regression analysis of the MLVA-16 matrix (a) against the MLSA matrix of 35 shared strains of *Xanthomonas oryzae* pv. *oryzae* and *X. oryzae* pv. *oryzicola* and (b) against the RFLP matrix of 56 shared strains of *X. oryzae* pv. *oryzicola*, using 999 permutations (GeneAlex 6.501).

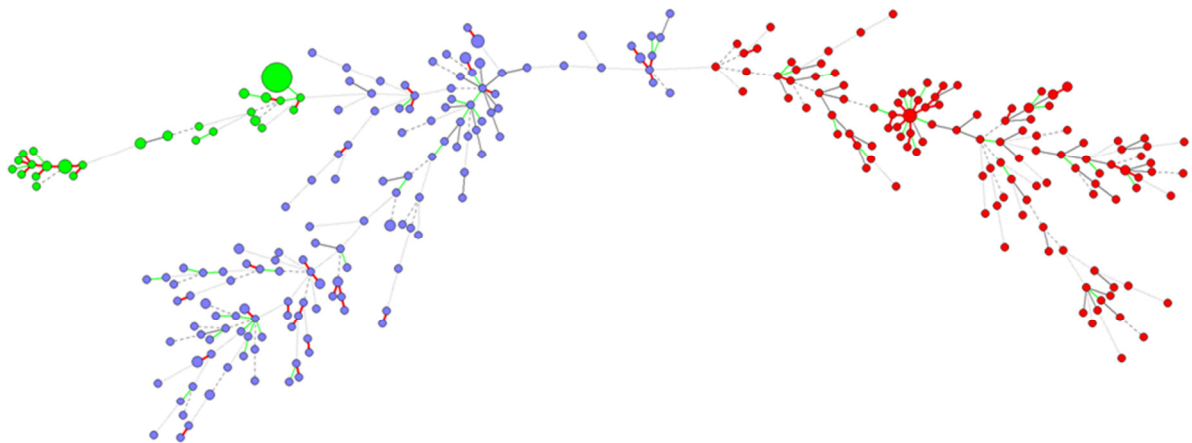

**FIG S3** Minimum spanning tree of the worldwide *X. oryzae* strain collection using BioNumerics 7.1 (red = Asian *Xoo*, green = African *Xoo*, blue = *Xoc*). Circle sizes are proportional to the number of strains per haplotype. Red lines correspond to single locus variants, green lines correspond to double locus variants, black lines correspond to triple locus variants, and dashed lines correspond to quadruple locus variants and light grey lines correspond to more-than-quadruple locus variants.





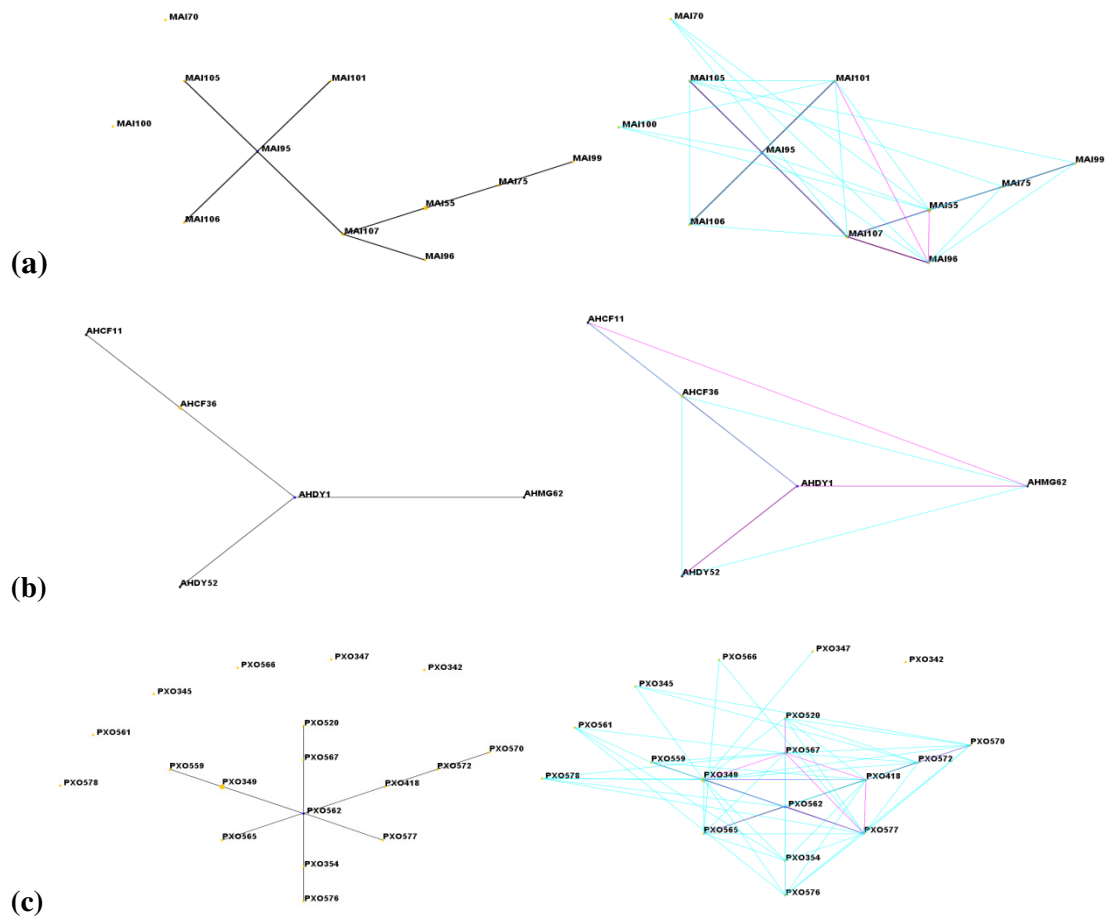

**FIG S5** eBURST analysis (a) of the Malian *Xanthomonas oryzae* pv. *oryzae* complex from 2012, (b) of the Chinese *X. oryzae* pv. *oryzicola* complex from 2011, and (c) of the Philippine *X. oryzae* pv. *oryzae* complex from 1994-2003. Complexes with single locus variants (in black), complexes with crosslinked single locus variants (in pink) and double locus variants (in blue) are represented.

## References

1. **Gonzalez C, Szurek B, Manceau C, Mathieu T, Sere Y, Verdier V.** 2007 Molecular and pathotypic characterization of new *Xanthomonas oryzae* strains from West Africa. *Mol. Plant Microbe Interact.* **20**:534–546.
2. **Leach JE, Rhoads ML, Vera Cruz CM, White FF, Mew TW, Leung H.** 1992. Assessment of genetic diversity and population structure of *Xanthomonas oryzae* pv. *oryzae* with a repetitive DNA element. *Appl. Environ. Microbiol.* **58**:2188–2195.
3. **Wonni I, Cottyn B, Detemmerman L, Dao S, Ouedraogo L, Sarra S, Tekete C, Poussier S, Corral R, Triplett L, Koita O, Koebnik R, Leach J, Szurek B, Maes M, Verdier V.** 2014. Analysis of *Xanthomonas oryzae* pv. *oryzicola* population in Mali and Burkina Faso reveals a high level of genetic and pathogenic diversity. *Phytopathology* **104**:520–531.
4. **Zhao S, Poulin L, Rodriguez-R LM, Forero-Serna N, Liu SH, Wonni I, Szurek B, Verdier V, Leach JE, He YQ, Feng JX, Koebnik R.** 2012. Development of a variable number of tandem repeats typing scheme for the bacterial rice pathogen *Xanthomonas oryzae* pv. *oryzicola*. *Phytopathology* **102**:948–956.
